# Supplementary material for: In situ C–H activation-derived polymer@TiO2 p–n heterojunction for photocatalytic hydrogen evolution
Source: Royal Society of Chemistry journal article supplement (doi:10.1039/d1se00970b), 2021-01-01
Supplement: d1se00970b1.pdf [file d1se00970b1.pdf]

Electronic Supplementary Information (ESI) for *Sustainable Energy & Fuels*

This journal is © The Royal Society of Chemistry 2018

## In-situ C–H activation-derived polymer@TiO<sub>2</sub> *p-n* heterojunction for photocatalytic hydrogen evolution

Yu-Qin Xing,<sup>a</sup> Zhi-Rong Tan,<sup>a</sup> Jing-Zhao Cheng,<sup>a</sup> Zhao-Qi Shen,<sup>a</sup> Yu-Jie Zhang,<sup>a</sup> Long Chen<sup>b</sup> and Shi-Yong Liu<sup>\*a</sup>

<sup>a</sup> College of Materials, Metallurgical and Chemistry, Jiangxi University of Science and Technology, Ganzhou 341000, P. R. China

<sup>b</sup> Department of Chemistry, Tianjin University, Tianjin 300072, P. R. China

### Corresponding author:

\* E-mail: [chelsy@zju.edu.cn](mailto:chelsy@zju.edu.cn), [chelsy@jxust.edu.cn](mailto:chelsy@jxust.edu.cn) (S. -Y. Liu)

### Characterization

X-ray diffraction (XRD) was measured by Thermo Fisher NexsaI instrument. X-ray photoelectron spectroscopy (XPS) was measured by Thermo Fisher NexsaI instrument. Morphology of heterojunction photocatalysts was gained by scanning electron microscope (SEM, MLA650F, American) and transmission electron microscopy (TEM, FEI Tecnai G2 F20, American). Fourier transformed infrared (FTIR) spectra were performed on a FT-IR spectrometer (Bruker, ALPHA) in the range of 4000-500 cm<sup>-1</sup>. UV-vis diffuse reflectance spectra were performed on UV-2600 scanning UV-vis spectrophotometer. Time-resolved fluorescence spectroscopy and photoluminescence (PL) spectra were carried out on HORIBA Instruments FL-1000 fluorescence spectrometer. Samples were degassed under vacuum at ambient temperature for 24 h. The volume of nitrogen adsorption was recorded over a relative pressure range between 0.01 and 0.99. 8 points in the relative pressure range of 0.05-0.2 were used for the calculation of the surface area according to the Brunauer-Emmet-Teller (BET) theory. Contact angle were obtained by JCY type measurement instrument (Shanghai Fang Rui Instrument Co. Ltd.).

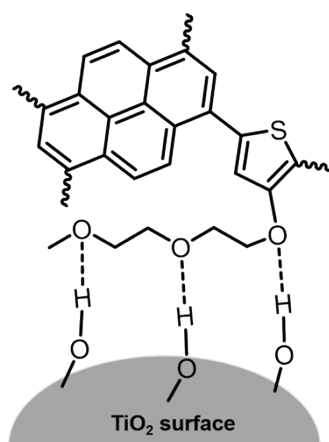

**Fig. S1** Hydrogen bond non-covalent interaction and structural illustration of PyOT@TiO<sub>2</sub>s.

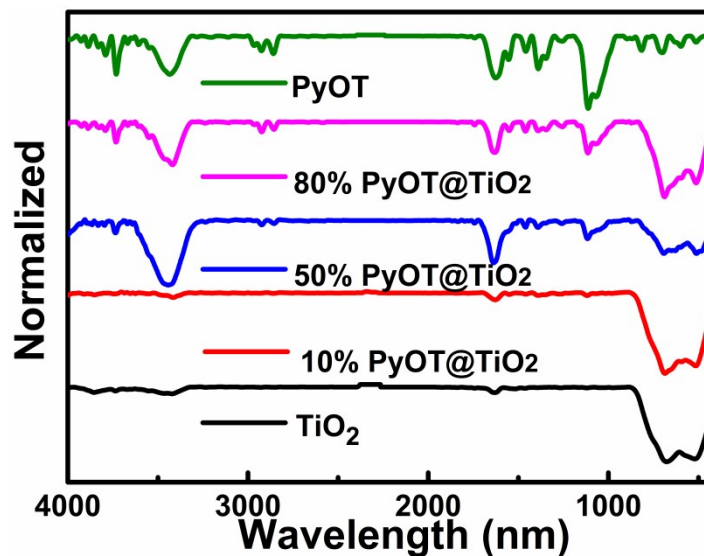

Fig. S2 FT-IR spectra of pristine TiO<sub>2</sub>, PyOT@TiO<sub>2</sub>s, and PyOT.

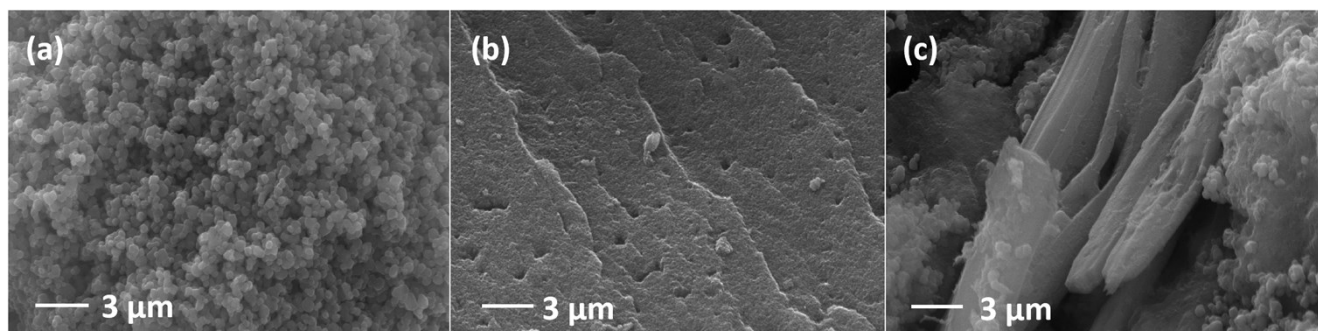

Fig. S3 SEM and TEM images of TiO<sub>2</sub> (a), PyOT (b), and 50% PyOT@TiO<sub>2</sub> (c).

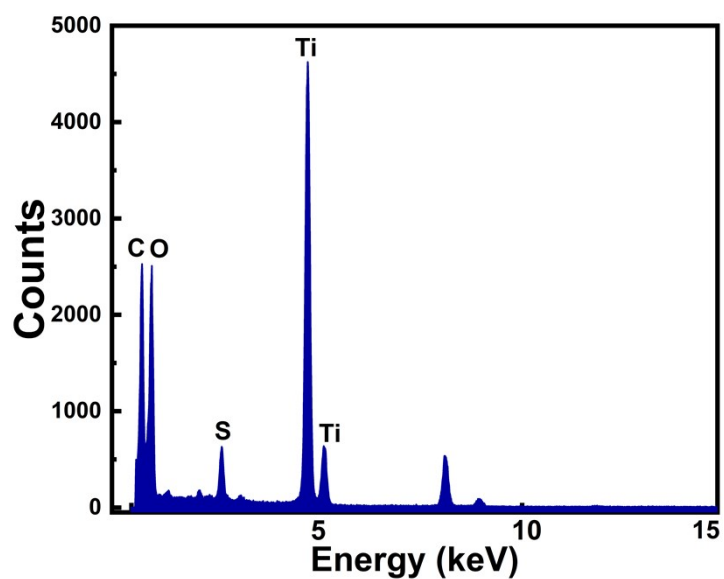

Fig. S4 EDS spectrum of 50% PyOT@TiO<sub>2</sub>.

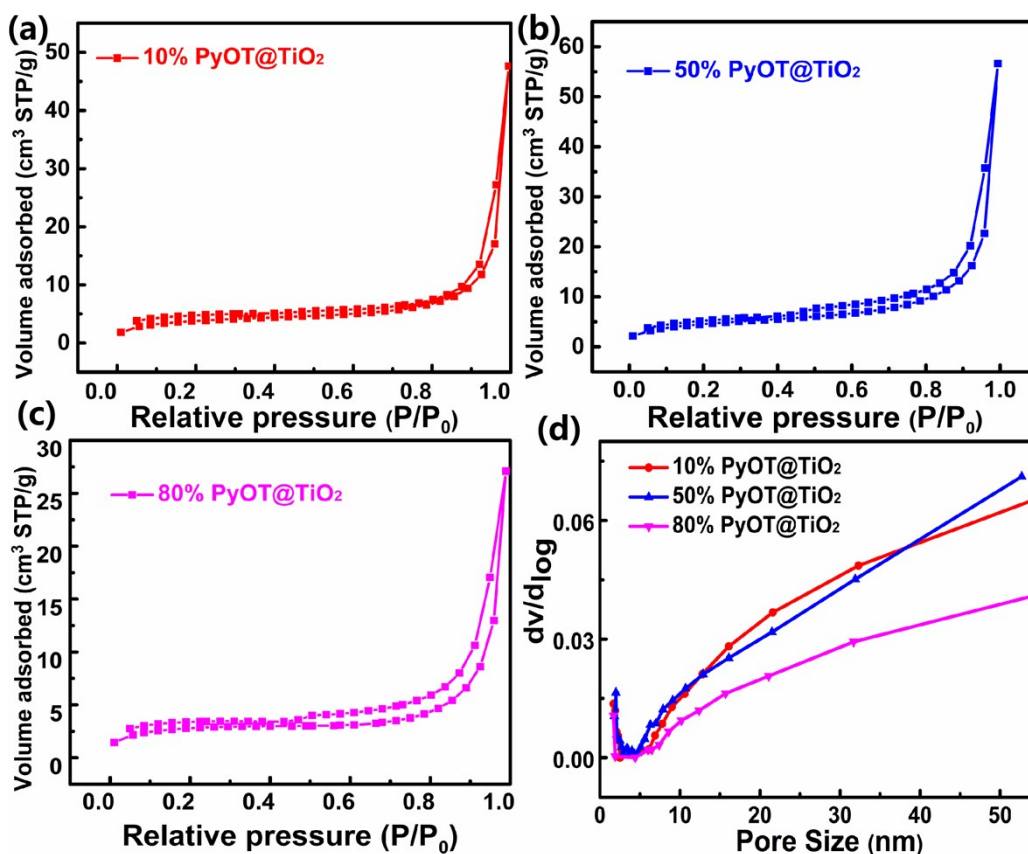

**Fig. S5** (a-c) N<sub>2</sub> adsorption-desorption isotherms and (d) pore size distributions of 10% PyOT@TiO<sub>2</sub>, 50% PyOT@TiO<sub>2</sub> and 80% PyOT@TiO<sub>2</sub>.

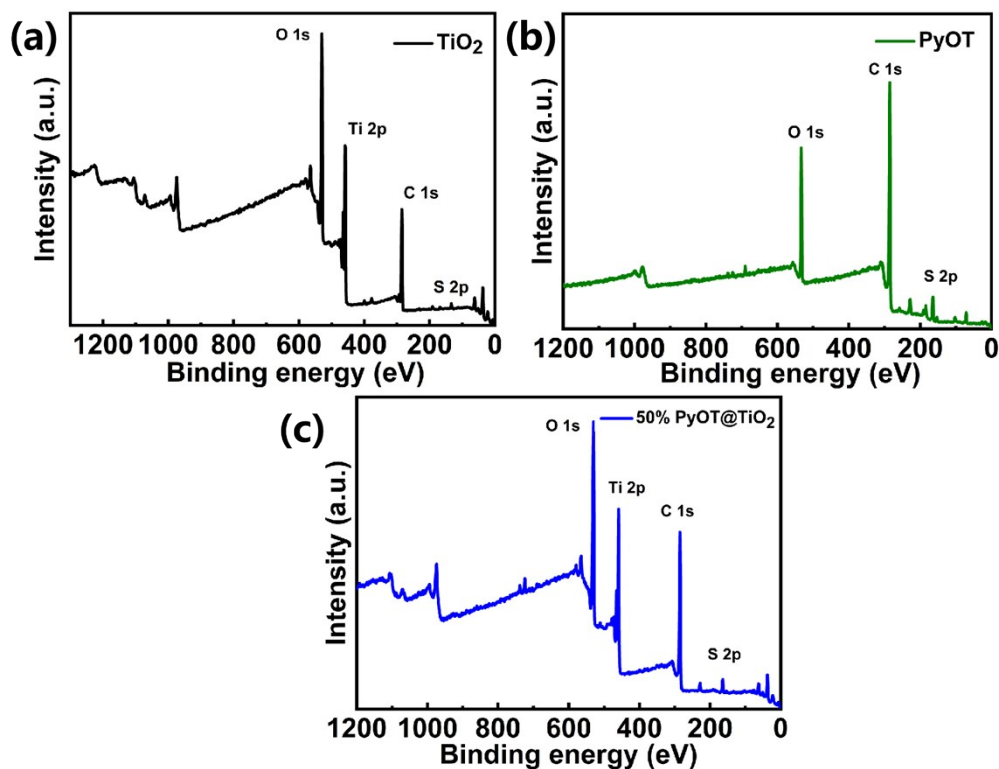

**Fig. S6** XPS of TiO<sub>2</sub> (a), PyOT (b), and 50% PyOT@TiO<sub>2</sub> (c).

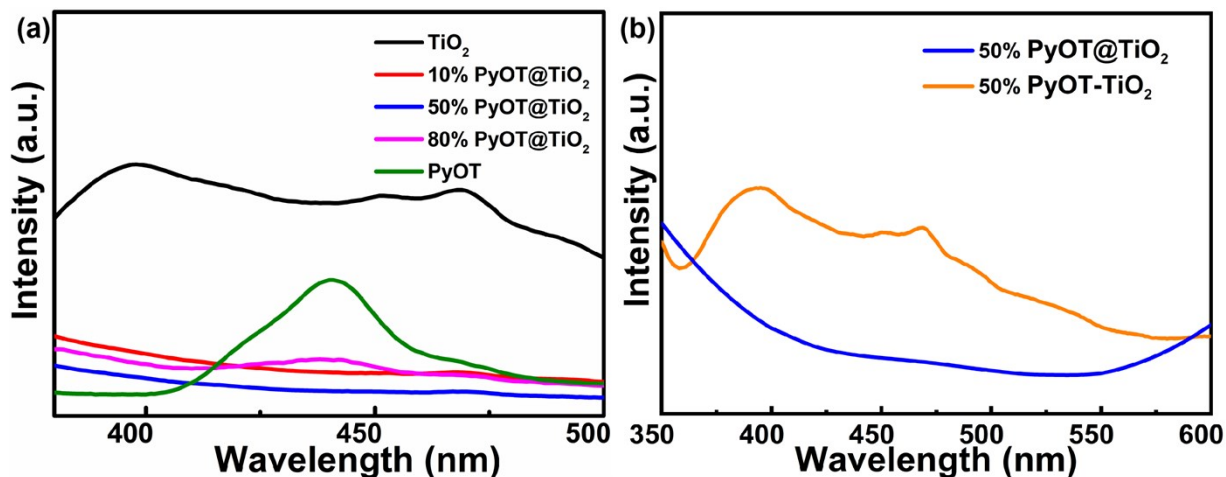

**Fig. S7** Partial enlarged PL spectra of all samples (a), and PL spectra of in-situ synthesized 50% PyOT@TiO<sub>2</sub> and mechanically mixed 50% PyOT-TiO<sub>2</sub> composites (b).

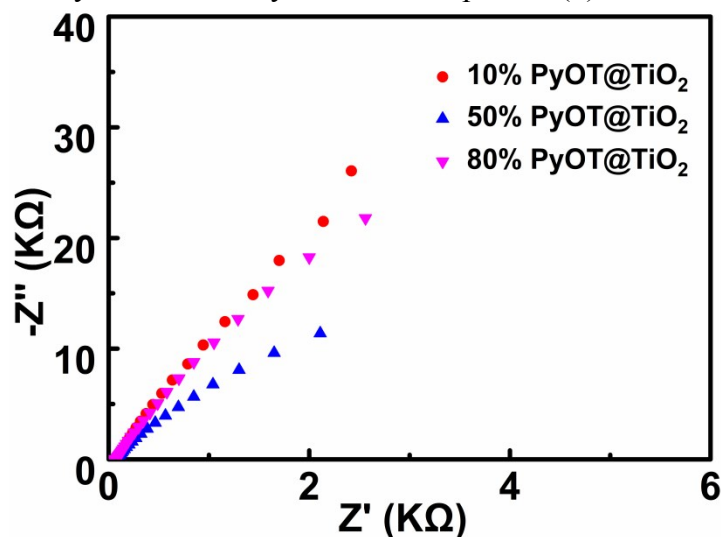

**Fig. S8** EIS Nyquist plots 10% PyOT@TiO<sub>2</sub>, 50% PyOT@TiO<sub>2</sub>, 80% PyOT@TiO<sub>2</sub> under visible light irradiation ( $\lambda \geq 420$  nm).

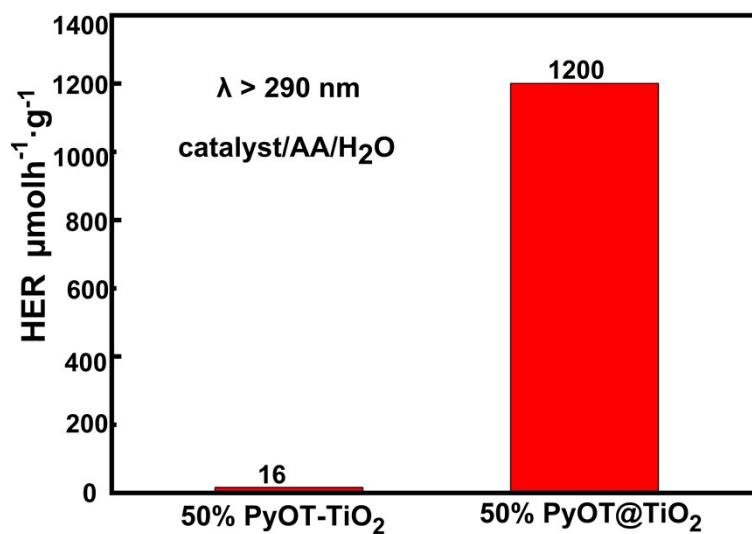

**Fig. S9** HERs of 50% PyOT-TiO<sub>2</sub> and 50% PyOT@TiO<sub>2</sub>.

**Table S1.** Comparisons of Photocatalytic HER of Various TiO<sub>2</sub>-Based Photocatalysts.

| Photocatalysts                                        | Sacrificial agent                                 | Light source  |             | HER( $\mu\text{mol h}^{-1} \text{g}^{-1}$ ) | Ref.      |
|-------------------------------------------------------|---------------------------------------------------|---------------|-------------|---------------------------------------------|-----------|
|                                                       |                                                   | Power(W)      | Filter (nm) |                                             |           |
| PyOT@TiO <sub>2</sub>                                 | AA                                                | 300 W Xe lamp | >420        | 541                                         | This work |
| NiS/TiO <sub>2</sub> nanofibers                       | CH <sub>3</sub> OH                                | 350 W Xe lamp | >420        | 655                                         | 1         |
| TiO <sub>2</sub> /CdS                                 | CH <sub>3</sub> OH                                | 350 W Xe lamp | >420        | 51.4                                        | 2         |
| BE-TiO <sub>2</sub>                                   | TEOA                                              | 300 W Xe lamp | >420        | 419.2                                       | 3         |
| TiO <sub>2</sub> (P25)-gC <sub>3</sub> N <sub>4</sub> | TEOA                                              | 150 W Hg Lamp | >420        | 419                                         | 4         |
| B-BT-1,4-E/TiO <sub>2</sub>                           | TEOA                                              | 300 W Xe lamp | >420        | 220.4                                       | 5         |
| BBT/TiO <sub>2</sub>                                  | TEOA                                              | 300W Xe lamp  | >420        | 30.0                                        | 6         |
| FeS <sub>2</sub> -TiO <sub>2</sub>                    | CH <sub>3</sub> OH                                | 300W Xe lamp  | >420        | 331                                         | 7         |
| g-C <sub>3</sub> N <sub>4</sub> /TiO <sub>2</sub>     | TEOA                                              | 300W Xe lamp  | >420        | 300                                         | 8         |
| TiO <sub>2</sub> @g-C <sub>3</sub> N <sub>4</sub>     | CH <sub>3</sub> OH                                | 300W Xe lamp  | >420        | 198                                         | 9         |
| MoS <sub>2</sub> /TiO <sub>2</sub>                    | Na <sub>2</sub> S+Na <sub>2</sub> SO <sub>3</sub> | 300W Xe lamp  | >420        | 143.32                                      | 10        |
| FH-TiO <sub>2</sub>                                   | CH <sub>3</sub> OH                                | 300 W Hg Lamp | >420        | 566                                         | 11        |

- 1) F. Xu, L. Zhang, B. Cheng, J. Yu. Direct Z-Scheme TiO<sub>2</sub>/NiS Core-Shell Hybrid Nanofibers with Enhanced Photocatalytic H<sub>2</sub>-Production Activity. *ACS Sustainable Chem. Eng.* 2018, 6, 12291-12298.
- 2) A. Meng, B. Zhu, B. Zhong, L. Zhang, B. Cheng. Direct Z-scheme TiO<sub>2</sub>/CdS hierarchical photocatalyst for enhanced photocatalytic H<sub>2</sub>-production activity. *Appl. Catal. B* 2019, 243, 19-26.
- 3) J. Xiao, Y. Luo, Z. Yang, Y. Xiang, X. Zhang, H. Chen. Synergistic design for enhancing solar-to-hydrogen conversion over TiO<sub>2</sub> based ternary hybrid. *Chen, Catal. Sci. Technol.*, 2018, 8, 2477-2487.
- 4) P. Jiménez-Calvo, V. Caps, M. Ghazzal, C. Colbeau-Justin, V. Keller. Au/TiO<sub>2</sub>(P25)-gC<sub>3</sub>N<sub>4</sub> composites with low g-C<sub>3</sub>N<sub>4</sub> content enhance TiO<sub>2</sub> sensitization for remarkable H<sub>2</sub> production from water under visible-light irradiation. 2020, 75, 104888.
- 5) Y. Xiang, X. Wang, X. Zhang, H. Hou, K. Dai, Q. Huang, Hao Chen. Enhanced Visible Light Photocatalytic Activity of TiO<sub>2</sub> Assisted by Organic Semiconductor: A Structure Optimization Strategy of Conjugated Polymer. *J. Mater. Chem. A*, 2018, 6, 153-159.
- 6) H. Hou, X. Zhang, D. Huang, X. Ding, S. Wang, X. Yang, S. Li, Y. Xiang, H. Chen. Conjugated microporous poly(benzothiadiazole)/TiO<sub>2</sub> heterojunction for visible-light-driven H<sub>2</sub> production and pollutant removal. *Appl. Catal. B* 2017, 203, 536-571.
- 7) T. Kuo, H. Liao, Y. Chen, C. Wei, C. Chang, Y. Chen, Y. Chang, J. Lin, Y. Lee, C. Wen, S. Li, K. Lin, D. Wang. Extended visible to near-infrared harvesting of earth-abundant FeS<sub>2</sub>-TiO<sub>2</sub> heterostructures for highly active photocatalytic hydrogen evolution. *Green Chem.*, 2018, 20, 1640-1647.
- 8) X. Wei, C. Shao, X. Li, N. Lu, K. Wang, Z. Zhang, Y. Liu. Facile in situ synthesis of plasmonic nanoparticles-decorated g-C<sub>3</sub>N<sub>4</sub>/TiO<sub>2</sub> heterojunction nanofibers and comparison study of their photosynergistic effects for efficient photocatalytic H<sub>2</sub> evolution. *Nanoscale*, 2016, 8, 11034-11043.
- 9) N. Guo, Y. Zeng, H. Li, X. Xu, H. Yu, X. Han. Novel mesoporous TiO<sub>2</sub>@g-C<sub>3</sub>N<sub>4</sub> hollow core@shell heterojunction with enhanced photocatalytic activity for water treatment and H<sub>2</sub> production under simulated sunlight. *J Hazard Mater.* 2018, 353, 80-88.

- 10) D. Cao, Q. Wang, S. Zhu, X. Zhang, Y. Li, Y. Cui, Z. Xue, S. Gao. Hydrothermal construction of flower-like MoS<sub>2</sub> on TiO<sub>2</sub> NTs for highly efficient environmental remediation and photocatalytic hydrogen evolution. *Sep. Purif. Technol.*, 2021, 265, 118463.
- 11) C. Gao, T. Wei, Y. Zhang, X. Song, Y. Huan, H. Liu, M. Zhao, J. Yu, X. Chen. A Photoresponsive Rutile TiO<sub>2</sub> Heterojunction with Enhanced Electron-Hole Separation for High-Performance Hydrogen Evolution. *Adv. Mater.* 2019, 31, 1806596.

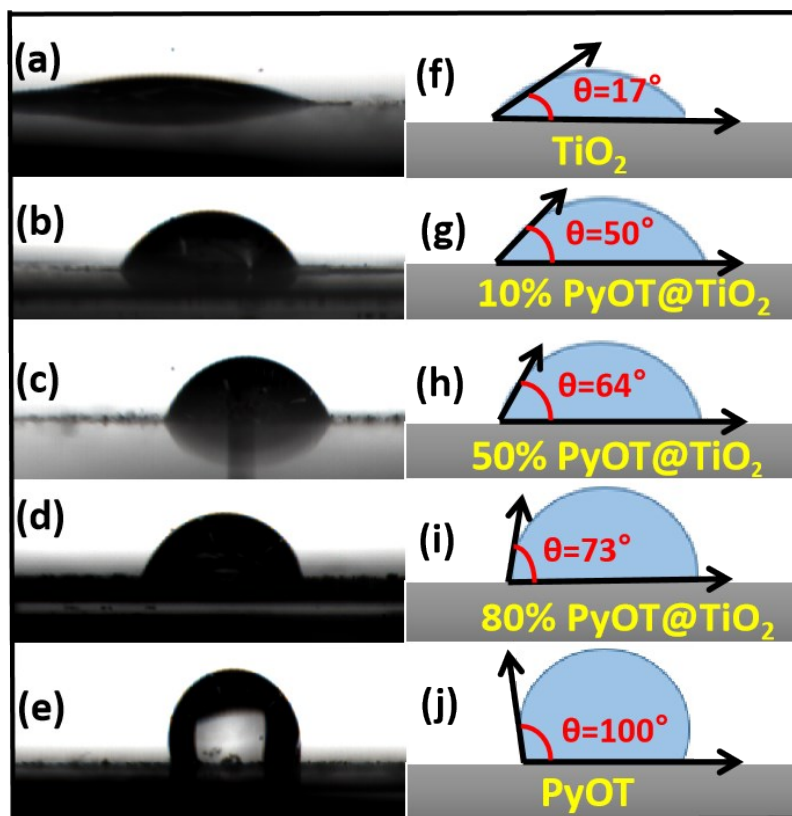

**Fig. S10** Optical diagrams of H<sub>2</sub>O droplets on samples TiO<sub>2</sub> (a), 10% PyOT@TiO<sub>2</sub> (b), 50% PyOT@TiO<sub>2</sub> (c), 80% PyOT@TiO<sub>2</sub> (d), and PyOT (e) surfaces, and their corresponding schematic interfaces and contact angles (f-j).

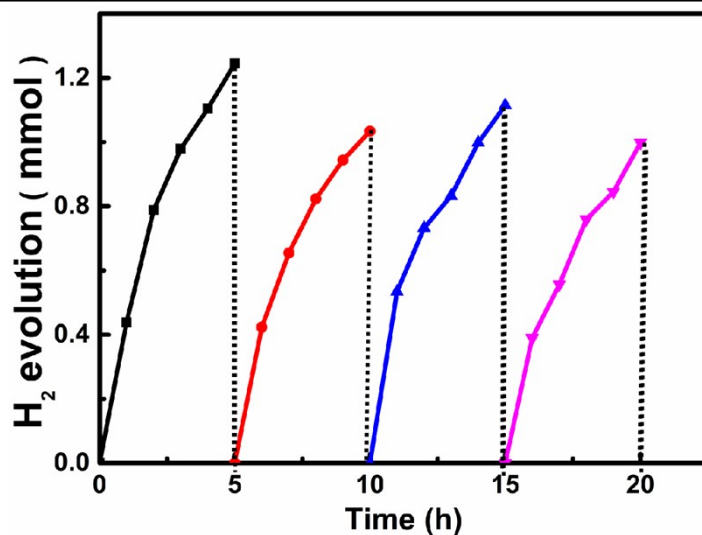

Fig. S11 Cycling test of H<sub>2</sub> evolution (evacuation every 5 h) for catalyst/H<sub>2</sub>O/AA mixture (In the third run, AA was recharged).

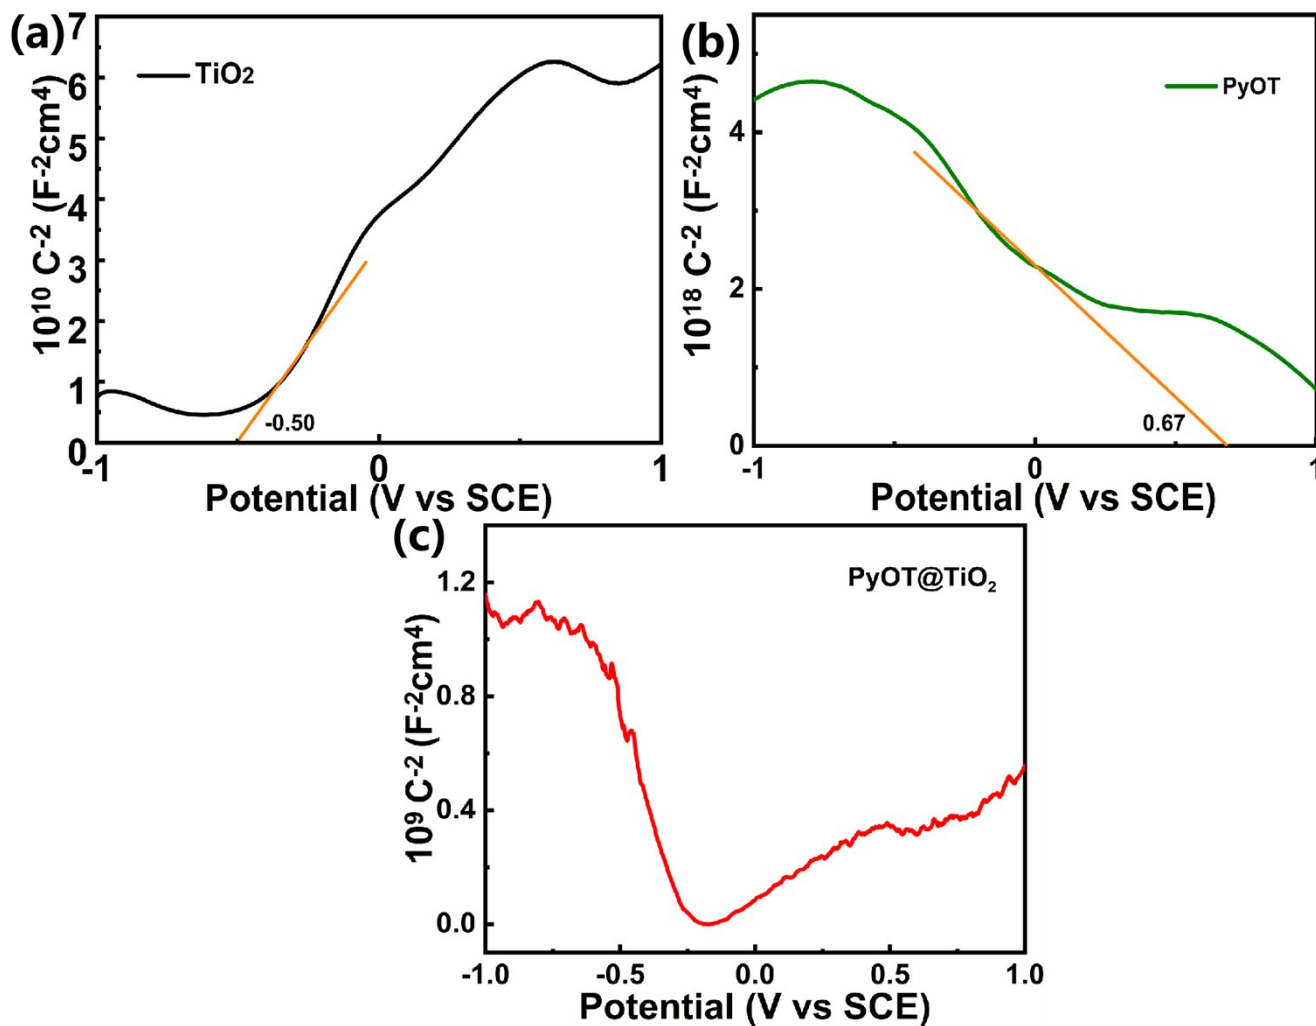

Fig. S12 Mott-Schottky (M-S) plots of TiO<sub>2</sub> (a), PyOT(b), 50% PyOT@TiO<sub>2</sub> (c).
